# Supplementary material for: Convenient methods for preparing π-conjugated linkers as building blocks for modular chemistry
Source: Beilstein J Org Chem. 2009 Apr 14;5:11. doi: 10.3762/bjoc.5.11 (PMC2686302; doi:10.3762/bjoc.5.11)
Supplement: File 1 — Experimental procedures and characterization of compounds. [file Beilstein_J_Org_Chem-05-11-s001.doc]

**Supporting Information**

# Convenient methods for preparing ‑conjugated linkers as building blocks for modular chemistry

Jiří Kulhánek, Filip Bureš* and Miroslav Ludwig

Address:Institute of Organic Chemistry and Technology, Faculty of Chemical Technology, University of Pardubice, nám. Čs. legií 565, Pardubice, 532 10, Czech Republic

Email: Filip Bureš* - filip.bures@upce.cz

* Corresponding author

**Experimental procedures and characterization of compounds**

Reagents and solvents were reagent-grade and were purchased from Penta, Aldrich, and Acros and used as received. Boronic acids/esters **1a**–**c**, terminal acetylenes **2a**–**c**, styryl dioxaborolanes **3a**–**b**, vinylboronate pinacol ester and pin2B2 were purchased from Aldrich. Column chromatography was carried out with silica gel 60 (particle size 0.040–0.063 mm, 230–400 mesh; Merck) and commercially available solvents. Thin-layer chromatography (TLC) was conducted on aluminum sheets coated with silica gel 60 F254 obtained from Merck, with visualization by UV lamp (254 or 360 nm). Melting points (mp) were measured on a Büchi B-540 melting-point apparatus in open capillaries and are uncorrected. 1H and 13C NMR spectra were recorded in CDCl3 at 360/500 MHz and 90/125 MHz, respectively, with a Bruker AMX 360 or Bruker AVANCE 500 instrument at 25 °C. Chemical shifts are reported in ppm relative to the signal of Me4Si. The residual solvent signal in the 1H and 13C NMR spectra was used as an internal reference (CDCl3 – 7.25 and 77.23 ppm). Coupling constants (*J*) are given in Hz. The apparent resonance multiplicity is described as s (singlet), d (doublet), t (triplet), q (quartet) and m (multiplet). In some cases, the carbon atoms with appended boron moiety were not observed in 13C NMR spectra. The mass spectra were measured on a GC/MS configuration comprised of an Agilent Technologies – 6890N gas chromatograph (HP-5MS column, length 30 m, I.D. 0.25 mm, film 0.25 µm) equipped with a 5973 Network MS detector (EI 70 eV, mass range 33−550 Da). Elemental analyses were performed on an EA 1108 Fisons instrument.

## Method A

Pd[P(*t*-Bu)3]2 (38 mg, 0.074 mmol) was added to a solution of vinylboronate pinacol ester (231 mg, 1.5 mmol), 4-bromo-*N*,*N*-dimethylaniline (290 mg, 1.45 mmol) and diisopropylamine (0.84 mL, 6.03 mmol) in dry toluene (8 mL) and the mixture was stirred under Ar at 80 °C for 1 h. After cooling to room temperature, the reaction mixture was quenched with a sat. solution of NH4Cl (20 mL, aq), the crude product was extracted with EtOAc (2 × 30 mL), dried (Na2SO4), concentrated in vacuo and purified by column chromatography (hexane/EtOAc, 4:1).

**(*E*)-2-[4-(*N*,*N*-Dimethylamino)styryl]-4,4,5,5-tetramethyl-1,3,2-dioxaborolane (3c).** White solid. Yield 289 mg (73%); mp 130–133 °C; *Rf* = 0.40 (silica gel; hexane/EtOAc, 4:1). 1H NMR (360 MHz, CDCl3, 25 °C): ** = 1.29 (s, 12H, CH3), 2.97 (s, 6H, CH3), 5.90 (d, 1H, *J* = 17.6 Hz, CH), 6.65 (d, 2H, *J* = 8.7 Hz, Ph-H), 7.33 (d, 1H, *J* = 17.6 Hz, CH), 7.38 (d, 2H, *J* = 8.7 Hz, Ph-H). 13C NMR (90 MHz, CDCl3, 25 °C): ** = 25.03, 40.51, 83.22, 112.16, 126.14, 128.61, 150.00, 151.16 (one signal missing). EI-MS (70 eV) *m/z* (rel. int.): 273 (M+, 100), 200 (18), 172 (29), 157 (46). Elemental Anal. Calcd for C16H24BNO2 (273.18): C,70.35; H, 8.86; N, 5.13. Found: C, 70.15; H, 8.56; N, 4.98.

## Method B

*n*-BuLi (0.5 mL, 0.8 mmol, 1.6 M solution in hexane) was added dropwise to a solution of substituted 4‑bromobiphenyl (0.8 mmol) in dry THF (20 mL) at −78 °C and the mixture was stirred under Ar for 1 h whereupon triisopropyl borate (0.2 mL; 0.85 mmol) was added and the reaction mixture was stirred at 25 °C for an additional 12 h. The reaction was quenched with diluted HCl (20 mL), the crude boronic acid extracted with EtOAc (2 × 30 mL), concentrated in vacuo and taken up in ether (30 mL). Pinacol (120 mg; 1.02 mmol) was added and the solution was stirred for 12 h at 25 °C, quenched with water, the dioxaborolane was extracted with ether (2 × 30 mL), dried (Na2SO4) and concentrated in vacuo. The crude product was purified by column chromatography.

**2-(4'-Methoxybiphenyl-4-yl)-4,4,5,5-tetramethyl-1,3,2-dioxaborolane (4b).** The title compound was synthesized from 4-bromo-4’-methoxybiphenyl following the general procedure as a white solid. Yield 201 mg (81%); mp 130−134 °C; *Rf* = 0.80 (silica gel; hexane/EtOAc, 2:1). 1H NMR (500 MHz, CDCl3, 25 °C): ** = 1.34 (s, 12H, CH3), 3.83 (s, 3H, CH3), 6.95 (d, 2H, *J* = 6.7 Hz, Ph-H), 7.51−7.56 (m, 4H, Ph-H), 7.84 (d, 2H, *J* = 6.7 Hz, Ph-H). 13C NMR (125 MHz, CDCl3, 25 °C): ** = 25.06, 55.56, 84.00, 114.42, 126.19, 128.45, 133.69, 135.44, 143.68, 159.58 (one signal missing). EI-MS (70 eV) *m/z* (rel. int.): 310 (M+, 100), 224 (18), 210 (86), 195 (16), 167 (23). Elemental Anal. Calcd for C19H23BO3 (310.20): C,73.57; H, 7.47. Found: C, 73.65; H, 7.58.

**2-[4'-(*N*,*N*-dimethylamino)biphenyl-4-yl]-4,4,5,5-tetramethyl-1,3,2-dioxaborolane (4c).** The title compound was synthesized from 4-bromo-4’-(*N*,*N*-dimethylamino)biphenyl following the general procedure as a white solid. Yield 214 mg (83%); mp 205−209 °C; *Rf* = 0.55 (silica gel; hexane/EtOAc, 4:1). 1H NMR (360 MHz, CDCl3, 25 °C): ** = 1.35 (s, 12H, CH3), 2.99 (s, 6H, CH3), 6.81−6.86 (m, 2H, Ph-H), 7.53−7.57 (m, 4H, Ph-H), 7.83 (d, 2H, *J* = 7.7 Hz, Ph-H). 13C NMR (125 MHz, CDCl3, 25 °C): ** = 25.08, 40.92, 83.91, 113.10, 125.7, 128.07, 128.88, 135.4, 143.97 (two signals missing). EI-MS (70 eV) *m/z* (rel. int.): 323 (M+, 100), 265 (16), 222 (21). Elemental Anal. Calcd for C20H26BNO2 (323.24): C,74.32; H, 8.11; N, 4.33. Found: C, 74.24; H, 7.98; N, 4.32.

## Method C

*Preparation of (E)-1-bromo-4-styrylbenzenes.* Synthetic method and full spectral characterization of (*E*)-1-bromo-4-[4-(*N*,*N*-dimethylamino)styryl]benzene were already reported [1]. (*E*)‑1-Bromo-4-(4-methoxystyryl)benzene was synthesized analogously with only prolonged isomerisation for up to 48 h.

**(*E*)‑1-Bromo-4-(4-methoxystyryl)benzene.** White solid, yield 37%; mp 191−194 °C; *Rf* = 0.50 (silica gel; hexane/EtOAc, 4:1). 1H NMR (500 MHz, CDCl3, 25 °C): ** = 3.80 (s, 3H, CH3), 6.85−6.89 (m, 3H, CH+Ph-H), 7.02 (d, 1H, *J* = 16.3 Hz, CH), 7.32 (d, 2H, *J* = 8.6 Hz, Ph-H), 7.41−7.44 (m, 4H, Ph-H). 13C NMR (125 MHz, CDCl3, 25 °C): ** = 55.52, 114.36, 120.96, 125.46, 127.89, 127.98, 129.10, 129.93, 131.89, 136.78, 159.65. EI-MS (70 eV) *m/z* (rel. int.): 288 (M+, 100), 165 (95). Elemental Anal. Calcd for C15H31BrO (289.17): C,62.30; H, 4.53; Br, 27.63. Found: C, 62.45; H, 4.60; Br, 27.69.

*Reaction with pin2B2.* PdCl2(dppf) (23 mg, 0.031 mmol) was added to a solution of bis(pinacolato)diboron (298 mg, 1.18 mmol), 4-substituted (*E*)-1-bromo-4-styrylbenzene (1.1 mmol), and potassium acetate (314 mg, 3.2 mmol) in DMSO (6 mL)/dioxane (2 mL) and the mixture was stirred under Ar at 80 °C for 4 h. After cooling to room temperature, the reaction mixture was quenched with a sat. solution of NH4Cl (20 mL, aq), the crude product was extracted with EtOAc (2 × 30 mL), dried (Na2SO4), concentrated in vacuo and purified by column chromatography.

**(*E*)-2-(4-(4-Methoxystyryl)phenyl)-4,4,5,5-tetramethyl-1,3,2-dioxaborolane (5b).** The title compound was synthesized from (*E*)‑1-bromo-4-(4-methoxystyryl)benzene following the general procedure as a white solid. Yield 255 mg (69%); mp 165−169 °C; *Rf* = 0.70 (silica gel; hexane/EtOAc, 4:1). 1H NMR (360 MHz, CDCl3, 25 °C): ** = 1.34 (s, 12H, CH3), 3.82 (s, 3H, CH3), 6.89 (d, 2H, *J* = 8.0 Hz, Ph-H), 6.97 (d, 1H, *J* = 16.5 Hz, CH), 7.13 (d, 1H, *J* = 16.5 Hz, CH), 7.44−7.49 (m, 4H, Ph-H), 7.77 (d, 2H, *J* = 7.0 Hz, Ph-H). 13C NMR (90 MHz, CDCl3, 25 °C): ** = 25.09, 55.55, 83.96, 114.38, 125.75, 126.74, 128.07, 129.40, 131.81, 135.35, 140.59, 159.66 (one signal missing). EI-MS (70 eV) *m/z* (rel. int.): 336 (M+, 100), 236 (22), 207 (19), 165 (16). Elemental Anal. Calcd for C21H25BO3 (336.19): C,75.01; H, 7.49. Found: C, 75.18; H, 7.58.

**(*E*)-2-{4-[4-(*N*,*N*-Dimethylamino)styryl]phenyl}-4,4,5,5-tetramethyl-1,3,2-dioxaborolane (5c).** The title compound was synthesized from (*E*)-1-bromo-4-[4-(*N*,*N*-dimethylamino)styryl]benzene following the general procedure as a white solid. Yield 315 mg (82%); mp 181−183 °C; *Rf* = 0.80 (silica gel; hexane/EtOAc, 2:1). 1H NMR (360 MHz, CDCl3, 25 °C): ** = 1.34 (s, 12H, CH3), 2.98 (s, 6H, CH3), 6.71 (d, 2H, *J* = 7.6 Hz, Ph-H), 6.91 (d, 1H, *J* = 16.5 Hz, CH), 7.11 (d, 1H, *J* = 16.5 Hz, CH), 7.41 (d, 2H, *J* = 7.9 Hz, Ph-H), 7.46 (d, 2H, *J* = 7.6 Hz, Ph-H), 7.76 (d, 2H, *J* = 7.8 Hz, Ph-H). 13C NMR (90 MHz, CDCl3, 25 °C): ** = 25.09, 40.70, 83.88, 112.66, 124.50, 125.50, 127.95, 130.01, 135.31, 141.17, 151.51 (two signals missing). EI-MS (70 eV) *m/z* (rel. int.): 349 (M+, 100), 248 (20). Elemental Anal. Calcd for C22H28BNO2 (349.27): C,75.65; H, 8.08, N, 4.01. Found: C, 75.68; H, 8.10, N, 3.99.

## Method D

PdCl2(PPh3)2 (32 mg, 0.046 mmol) and CuI (17 mg, 0.089 mmol) were added to a solution of 2-(4-iodophenyl)-4,4,5,5-tetramethyl-1,3,2-dioxaborolane (500 mg, 1.5 mmol), **2a**−**c** (1.5 mmol), and TEA (1.1 mL, 7.9 mmol) in THF (15 mL) and the mixture was stirred under Ar at 40 °C for 3 h. After cooling to room temperature, the reaction mixture was quenched with water (20 mL), the crude product was extracted with EtOAc (2 × 30 mL), dried (Na2SO4), concentrated in vacuo and purified by column chromatography.

**4,4,5,5-Tetramethyl-2-[4-(phenylethynyl)phenyl)]-1,3,2-dioxaborolane (6a).** The title compound was synthesized from **2a** following the general procedure as a white solid. Yield 356 mg (78%); mp 93−95 °C; *Rf* = 0.80 (silica gel; hexane/EtOAc, 4:1). 1H NMR (360 MHz, CDCl3, 25 °C): ** = 1.35 (s, 12H, CH3), 7.32−7.35 (m, 3H, Ph-H), 7.52 (d, 4H, *J* = 7.5 Hz, Ph-H), 7.78 (d, 2H, *J* = 7.7 Hz, Ph-H). 13C NMR (90 MHz, CDCl3, 25 °C): ** = 25.09, 84.17, 89.76, 90.91, 123.38, 126.17, 128.56, 130.98, 131.87, 134.81, 136.49, 137.13. EI-MS (70 eV) *m/z* (rel. int.): 304 (M+, 81), 289 (19), 218 (31), 204 (100), 176 (15). Elemental Anal. Calcd for C20H21BO2 (304.19): C,78.97; H, 6.96. Found: C, 78.91; H, 6.98.

**2-{4-[(4-Methoxyphenyl)ethynyl]phenyl}-4,4,5,5-tetramethyl-1,3,2-dioxaborolane (6b).** The title compound was synthesized from **2b** following the general procedure as a white solid. Yield 361 mg (72%); mp 132−134 °C; *Rf* = 0.70 (silica gel; hexane/EtOAc, 4:1). 1H NMR (360 MHz, CDCl3, 25 °C): ** = 1.34 (s, 12H, CH3), 3.82 (s, 3H, CH3), 6.87 (d, 2H, *J* = 8.5 Hz, Ph‑H), 7.45−7.51 (m, 4H, Ph-H), 7.76 (d, 2H, *J* = 7.6 Hz, Ph-H). 13C NMR (90 MHz, CDCl3, 25 °C): ** = 25.10, 55.52, 84.14, 88.53, 91.00, 102.24, 114.23, 115.49, 126.53, 130.81, 133.35, 134.79, 159.94. EI-MS (70 eV) *m/z* (rel. int.): 334 (M+, 100), 234 (51), 219 (22), 191 (24). Elemental Anal. Calcd for C21H23BO3 (334.22): C,75.47; H, 6.94. Found: C, 75.69; H, 6.83.

**2-(4-{[4-(*N*,*N*-Dimethylamino)phenyl]ethynyl}phenyl)-4,4,5,5-tetramethyl-1,3,2-dioxaborolane (6c).** The title compound was synthesized from **2c** following the general procedure as a white solid. Yield 473 mg (91%); mp 177−179 °C; *Rf* = 0.45 (silica gel; hexane/EtOAc, 4:1). 1H NMR (360 MHz, CDCl3, 25 °C): ** = 1.34 (s, 12H, CH3), 2.98 (s, 6H, CH3), 6.64 (d, 2H, *J* = 8.6 Hz, Ph‑H), 7.40 (d, 2H, *J* = 8.6 Hz, Ph-H), 7.48 (d, 2H, *J* = 7.6 Hz, Ph-H), 7.75 (d, 2H, *J* = 7.6 Hz, Ph-H). 13C NMR (90 MHz, CDCl3, 25 °C): ** = 25.10, 40.40, 84.07, 87.88, 92.40, 102.22, 110.08, 112.01, 127.15, 130.62, 133.02, 134.74, 150.4. EI-MS (70 eV) *m/z* (rel. int.): 347 (M+, 100), 289 (18), 246 (23). Elemental Anal. Calcd for C22H26BNO2 (347.26): C,76.09; H, 7.55; N, 4.03. Found: C, 75.99; H, 7.51; N, 4.06.

## Method E

PdCl2(PPh3)2 (21 mg, 0.030 mmol), CuI (11 mg, 0.060 mmol), and trimethylsilylacetylene (0.14 mL, 2.0 mmol) were added to a solution of iodo substrate (1.5 mmol) in TEA (3 mL, 21.6 mmol) and THF (20 mL) and the mixture was stirred under Ar at 25 °C for 30 min. The solvent was evaporated in vacuo, the residue taken up in DCM (15 mL) and filtered through a plug (silica gel; DCM) to afford pure TMS-protected acetylenes **10**−**12**.

The above TMS-protected acetylene (1.0 mmol) was dissolved in THF (20 mL), TBAF (1.0 mL; 1 M solution in THF) was added and the reaction mixture stirred for 30 min. The solvent was evaporated in vacuo, the residue taken up in DCM (15 mL) and filtered through a plug (silica gel; DCM) to afford pure products **7c**−**9c**.

***N*,*N*-Dimethyl-4'-[(trimethylsilyl)ethynyl]biphenyl-4-amine (10).** Off-white solid. Yield 431 mg (98%); mp 193−194 °C; *Rf* = 0.55 (silica gel; hexane/DCM, 1:1). 1H NMR (500 MHz, CDCl3, 25 °C): ** = 0.25 (s, 9H, CH3), 2.99 (s, 6H, CH3), 6.78 (d, 2H, *J* = 8.8 Hz, Ph‑H), 7.45−7.50 (m, 4H, Ph-H). 13C NMR (125 MHz, CDCl3, 25 °C): ** = 0.27, 40.73, 94.81, 105.65, 112.89, 120.62, 125.98, 127.80, 128.11, 132.54, 141.39, 150.65. EI-MS (70 eV) *m/z* (rel. int.): 293 (M+, 100), 278 (65), 262 (22), 139 (31).

**4'-Ethynyl-*N*,*N*-dimethylbiphenyl-4-amine (7c).** Off-white solid. Yield 203 mg (92%); mp 156−157 °C; *Rf* = 0.60 (silica gel; hexane/DCM, 1:1). 1H NMR (500 MHz, CDCl3, 25 °C): ** = 3.00 (s, 6H, CH3), 3.10 (s, 1H, CH), 6.79 (d, 2H, *J* = 8.8 Hz, Ph‑H), 7.49−7.52 (m, 6H, Ph-H). 13C NMR (125 MHz, CDCl3, 25 °C): ** = 40.70, 77.38, 84.16, 112.88, 126.11, 127.83, 127.91, 128.85, 132.69, 141.78, 150.41. EI-MS (70 eV) *m/z* (rel. int.): 221 (M+, 100), 205 (15), 176 (19). Elemental Anal. Calcd for C16H15N (221.30): C,86.84; H, 6.83; N, 6.33. Found: C, 86.95; H, 6.91; N, 6.36.

**(*E*)-*N*,*N*-Dimethyl-4-{4-[(trimethylsilyl)ethynyl]styryl}aniline (11).** Yellowish solid. Yield 464 mg (97%); mp 193−194 °C; *Rf* = 0.45 (silica gel; hexane/DCM, 1:1). 1H NMR (500 MHz, CDCl3, 25 °C): ** = 0.25 (s, 9H, CH3), 2.98 (s, 6H, CH3), 6.70 (d, 2H, *J* = 8.9 Hz, Ph‑H), 6.87 (d, 1H, *J* = 16.3 Hz, CH), 7.05 (d, 1H, *J* = 16.3 Hz, CH), 7.38−7.49 (m, 6H, Ph-H). 13C NMR (125 MHz, CDCl3, 25 °C): ** = 0.25, 40.67, 94.66, 105.74, 112.55, 121.09, 123.68, 125.54, 125.91, 127.95, 130.06, 132.42, 138.63, 150.46. EI-MS (70 eV) *m/z* (rel. int.): 319 (M+, 100), 304 (26), 152 (27).

**(*E*)-4-(4-Ethynylstyryl)-*N*,*N*-dimethylaniline (8c).** Yellowish solid. Yield 225 mg (91%); mp 189−190 °C; *Rf* = 0.45 (silica gel; hexane/DCM, 1:1). 1H NMR (500 MHz, CDCl3, 25 °C): ** = 2.99 (s, 6H, CH3), 3.11 (s, 1H, CH), 6.71 (d, 2H, *J* = 8.9 Hz, Ph‑H), 6.87 (d, 1H, *J* = 16.3 Hz, CH), 7.06 (d, 1H, *J* = 16.3 Hz, CH), 7.39−7.48 (m, 6H, Ph-H). 13C NMR (125 MHz, CDCl3, 25 °C): ** = 40.68, 77.65, 84.24, 112.55, 120.04, 123.55, 125.46, 125.99, 127.98, 130.28, 132.58, 138.98, 150.50. EI-MS (70 eV) *m/z* (rel. int.): 247 (M+, 100), 231 (12), 202 (20). Elemental Anal. Calcd for C18H17N (247.33): C,87.41; H, 6.93; N, 5.66. Found: C, 87.55; H, 6.95; N, 5.56.

***N*,*N*-Dimethyl-4-{[4-[(trimethylsilyl)ethynyl]phenyl]ethynyl}aniline (12).** Off-white solid. Yield 471 mg (99%); mp 129−130 °C; *Rf* = 0.30 (silica gel; hexane/DCM, 4:1). 1H NMR (500 MHz, CDCl3, 25 °C): ** = 0.25 (s, 9H, CH3), 2.99 (s, 6H, CH3), 6.64 (d, 2H, *J* = 9.0 Hz, Ph‑H), 7.39−7.41 (m, 6H, Ph-H). 13C NMR (125 MHz, CDCl3, 25 °C): ** = 0.16, 40.38, 87.40, 93.04, 95.89, 105.14, 109.82, 111.98, 122.08, 124.54, 131.19, 132.02, 132.98, 150.40. EI-MS (70 eV) *m/z* (rel. int.): 317 (M+, 100), 302 (36), 286 (20), 151 (28).

**4-[(4-Ethynylphenyl)ethynyl]-*N*,*N*-dimethylaniline (9c).** Off-white solid. Yield 218 (89%); mp 163−164 °C (Lit. [2] mp 138−140 °C); *Rf* = 0.20 (silica gel; hexane/DCM, 4:1). 1H and 13C NMR spectra were consistent with those reported in the literature [2]. EI-MS (70 eV) *m/z* (rel. int.): 245 (M+, 100), 229 (19), 200 (19).

## General procedure for the conversion of ArBr to ArI derivatives

*n*-BuLi (0.66 mL, 1.05 mmol, 1.6 M solution in hexane) was added dropwise to a solution of substituted 4-bromobiphenyl or 4-bromostilbene (1.0 mmol) in dry THF (20 mL) at −78 °C and the mixture was stirred under Ar for 30 min whereupon iodine (533 mg; 2.1 mmol) was added and the reaction mixture was stirred at 25 °C for an additional 2 h. The solvent was evaporated, the residue taken up in DCM, washed with sat. NaHSO3 (aq), dried (Na2SO4) and concentrated in vacuo to afford iodo‑derivative which was used directly in the next step without further purification.

# References

1. Oehlke, A.; Auer, A. A.; Jahre, I.; Walfort, B.; Rüffer, T.; Zoufalá, P.; Lang, H.; Spange, S. *J. Org. Chem.* **2007,** *72,* 4328–4339. doi:[10.1021/jo070084v](http://dx.doi.org/10.1021/jo070084v)
2. Liu, Z.-q.; Fang, Q.; Wang, D.; Cao, D.-x.; Xue, G.; Yu, W.-t.; Lei, H. *Chem.–Eur. J.* **2003,** *9,* 5074–5084. doi:[10.1002/chem.200304833](http://dx.doi.org/10.1002/chem.200304833)
